# Supplementary material for: Beyond precipitation: diversity of drivers of high river flows in European near-natural catchments
Source: Copernicus journal article supplement (doi:10.5194/hess-2022-404), 2022-12-20
Supplement: Supplementary file 1 [file hess-2022-404-supplement.pdf]

## Supplementary material

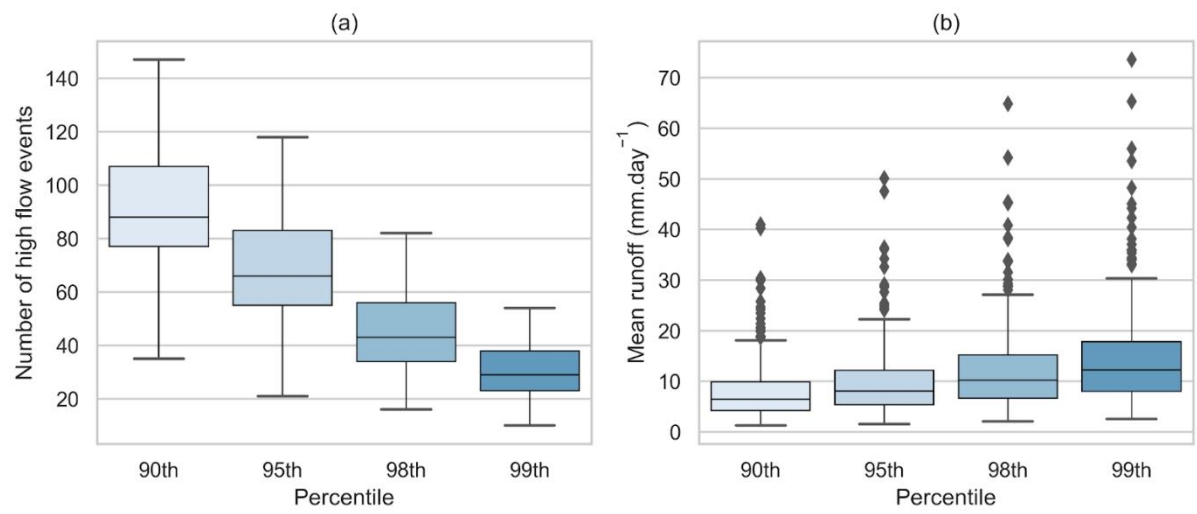

**Figure S1: Boxplots of the number of high flow events for each catchment and percentile (a) and their corresponding runoff magnitude (b).**

(a) Dominant driver for different time scales preceding the high flow event ( $Q > 95\text{th percentile}$ )

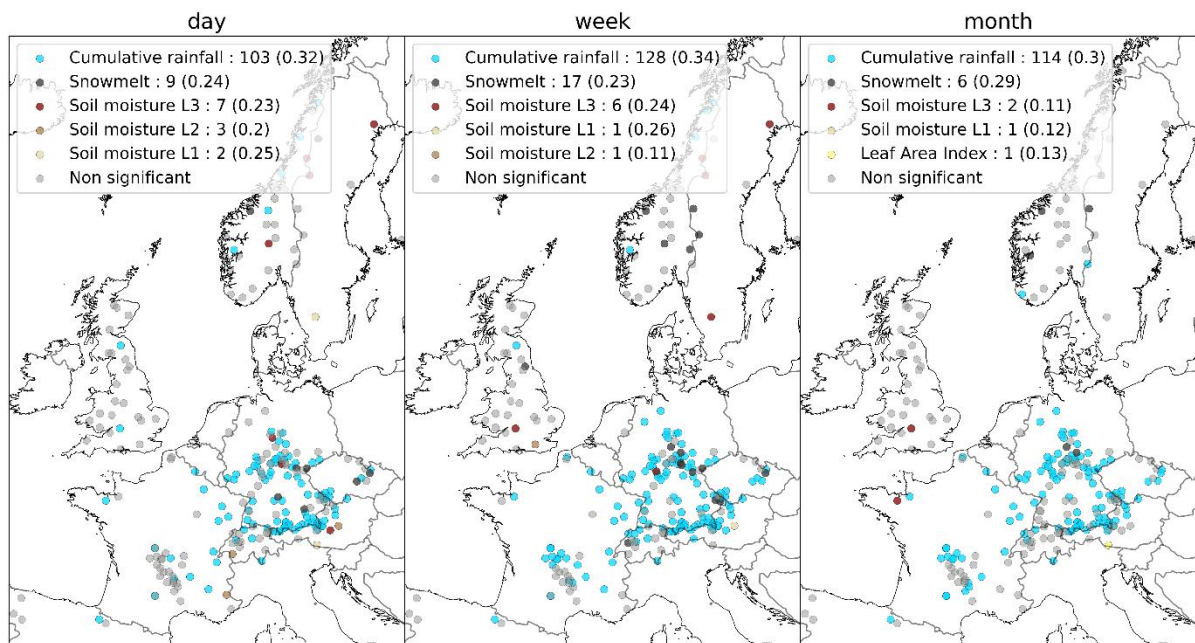

(b) Dominant driver for different time scales preceding the high flow event ( $Q > 98\text{th percentile}$ )

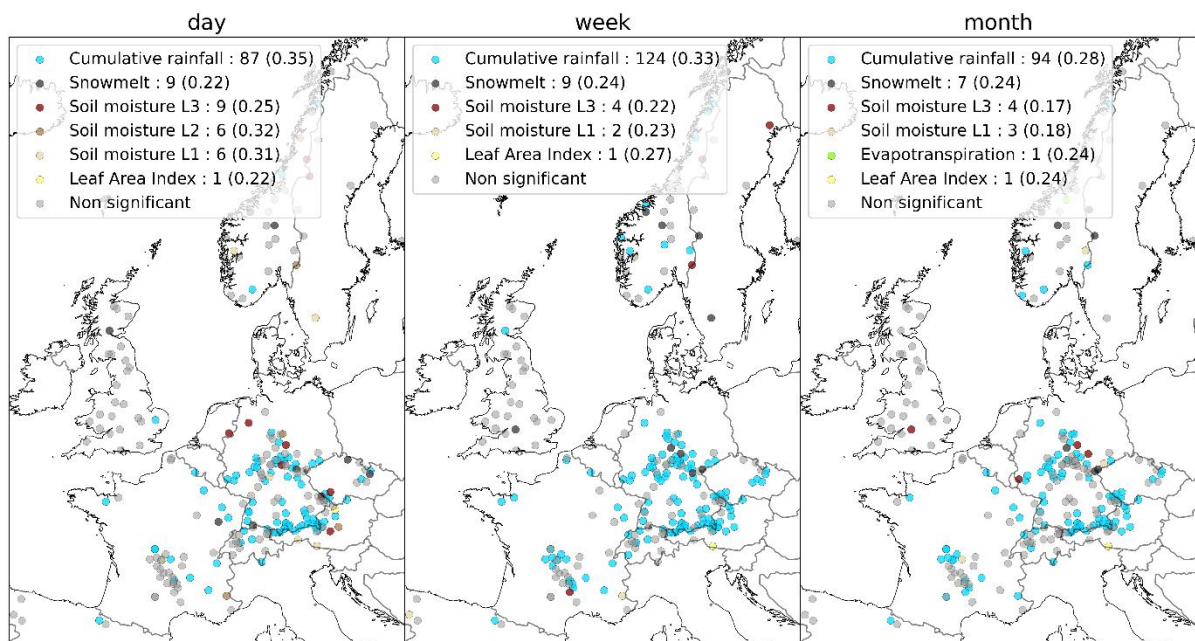

(c) Dominant driver for different time scales preceding the high flow event ( $Q > 99^{\text{th}}$  percentile)

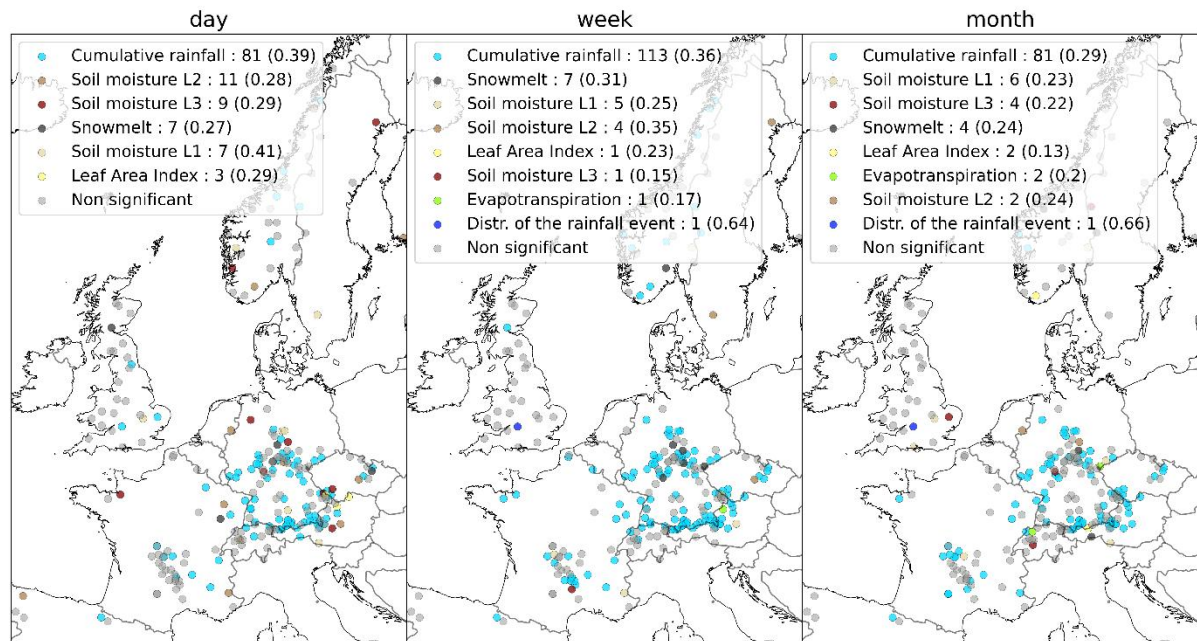

**Figure S2: Illustration of most influential drivers of extreme high flows exceeding the 95<sup>th</sup> (a), 98<sup>th</sup> (b) and 99<sup>th</sup> (c) percentile using the multi-inference method.**

(a) Dominant drivers for different time scales preceding high flow events (Q > 90th percentile)

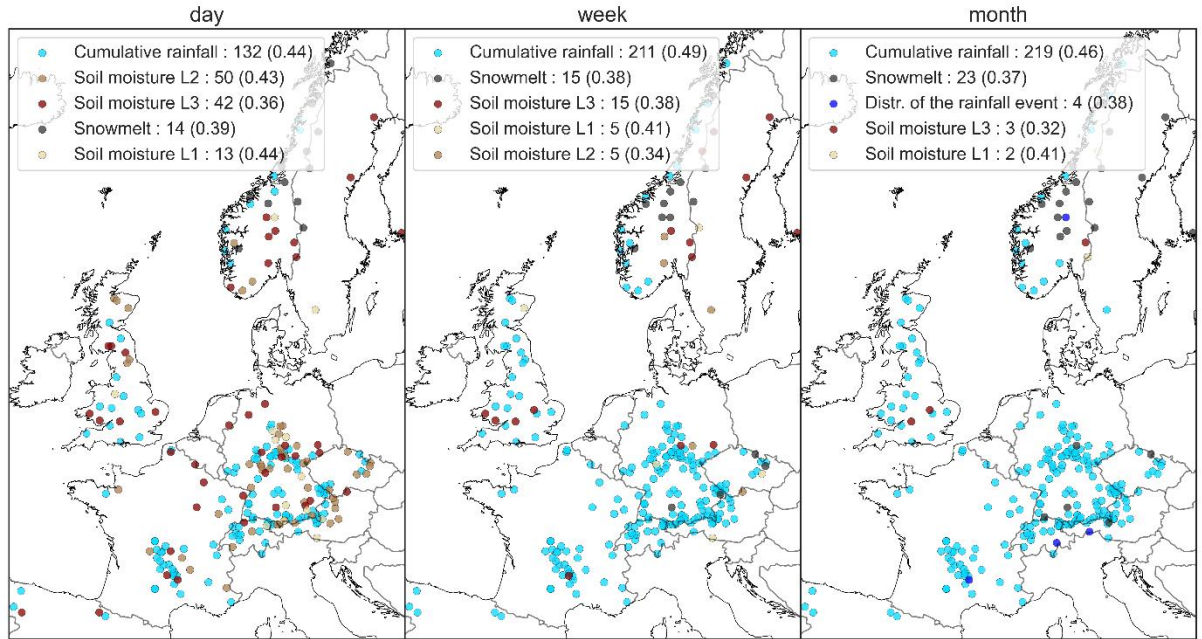

(b) Dominant drivers for different time scales preceding high flow events (Q > 99.5th percentile)

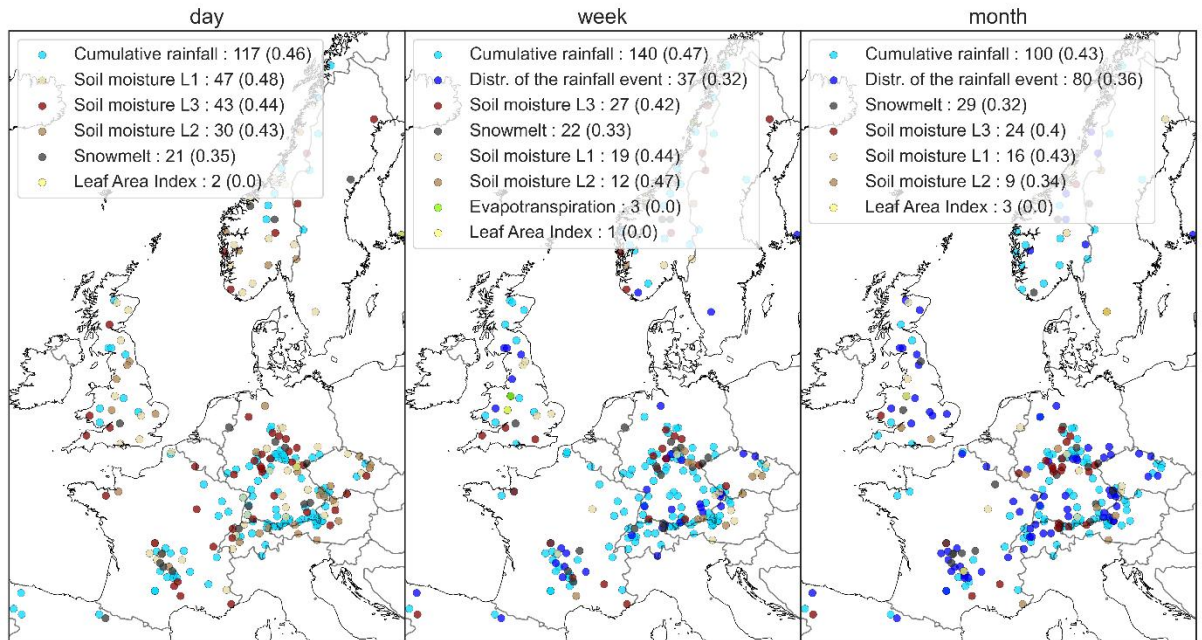

**Figure S3: Illustration of most influential drivers of extreme high flows exceeding the 90th (a) and 99.5th (b) percentile using the correlation analysis method.**



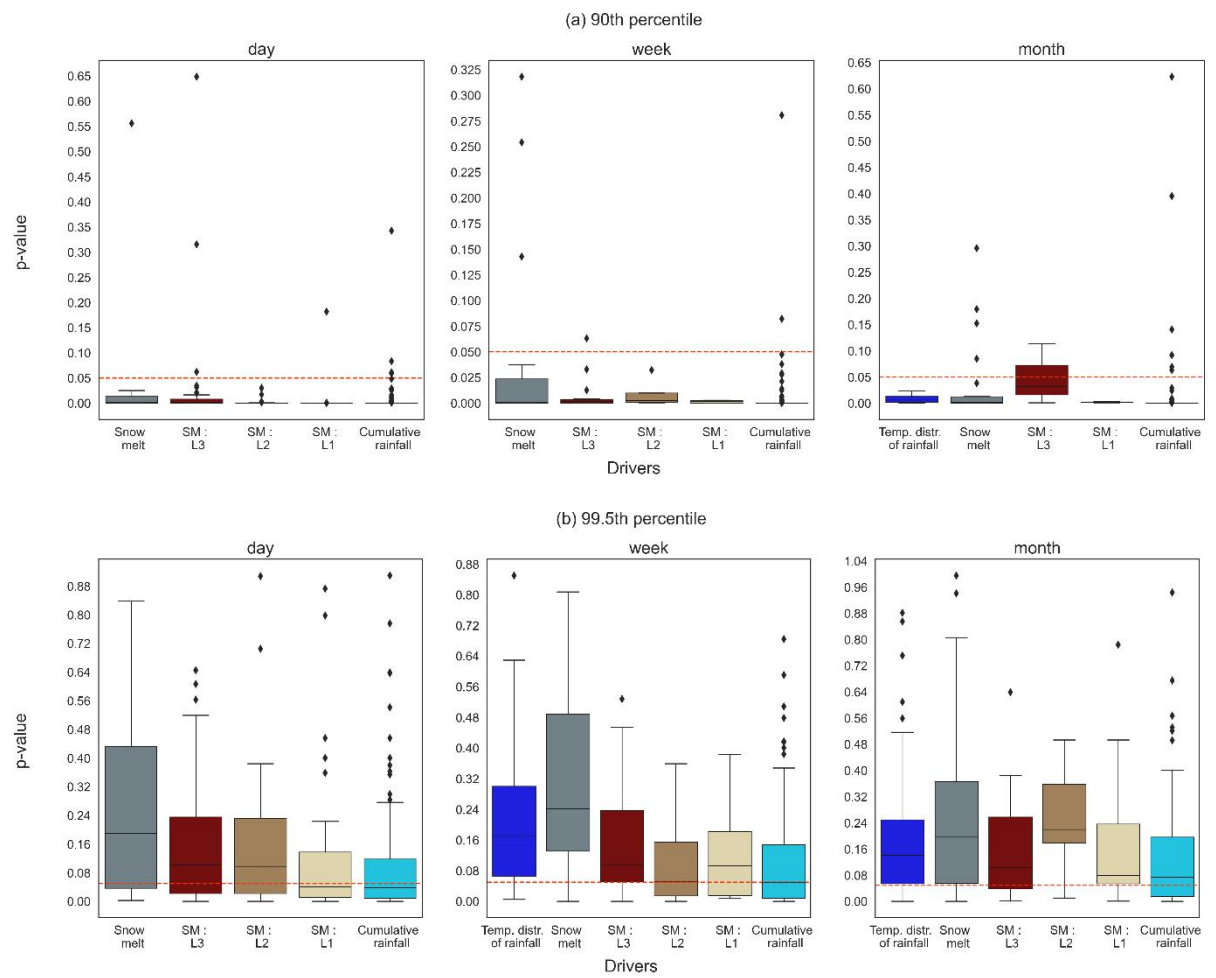

**Figure S4: Significance of the correlation analysis across different percentiles and drivers.**

Second most important driver for different time scales preceding the high flow event ( $Q > 99$ th percentile)

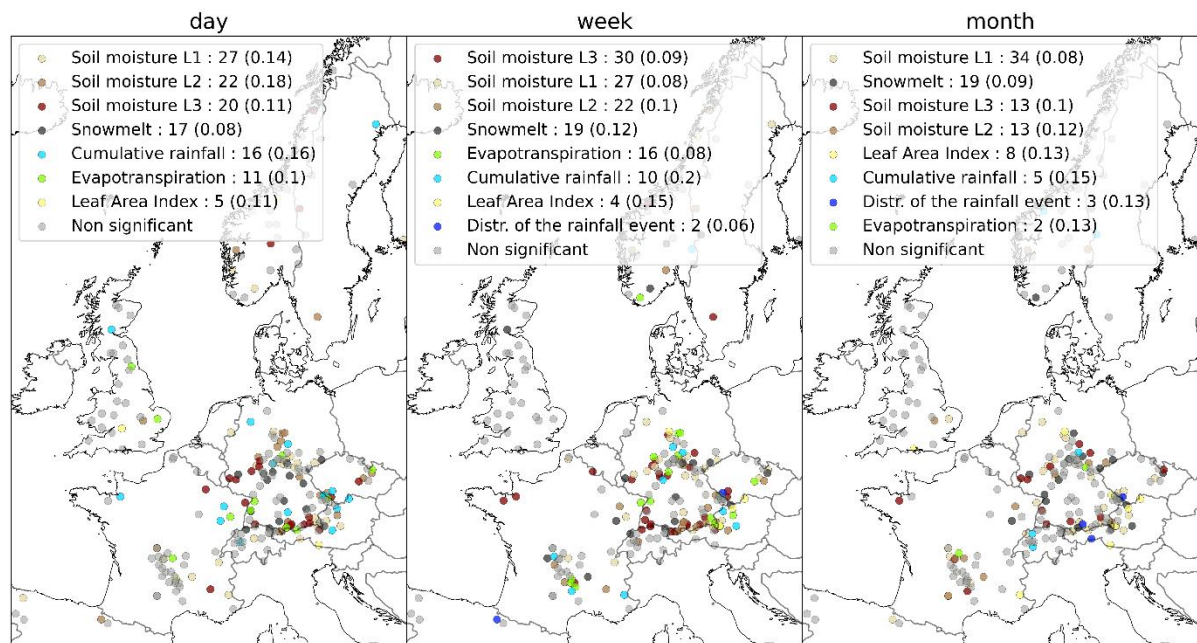

**Figure S5: Illustration of the second most influential drivers of extreme high flows exceeding the 99th percentile using the multi-inference method.**

(a) Relevance of rainfall across time scales (Q > 90th percentile)

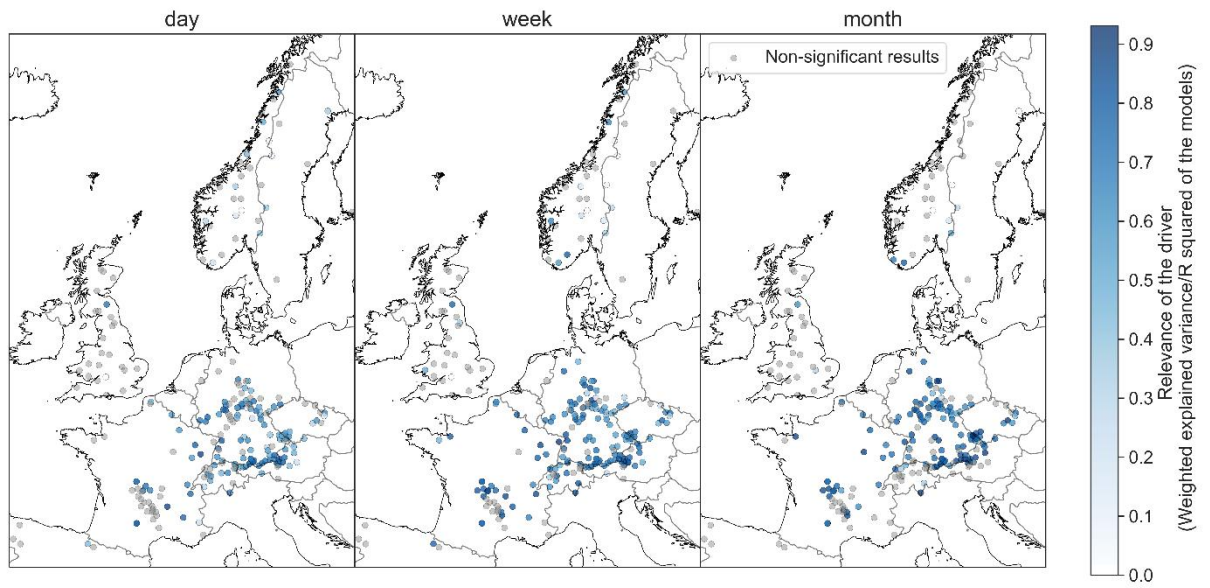

(b) Relevance of soil moisture across time scales (Q > 90th percentile)

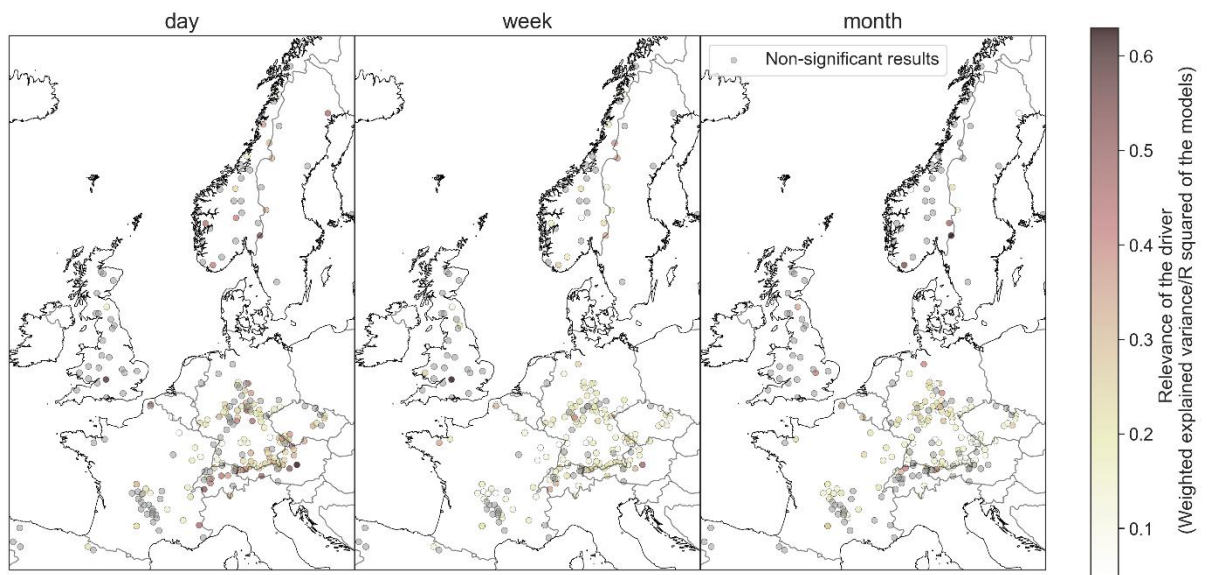

(c) Relevance of snowmelt across time scales (Q > 90th percentile)

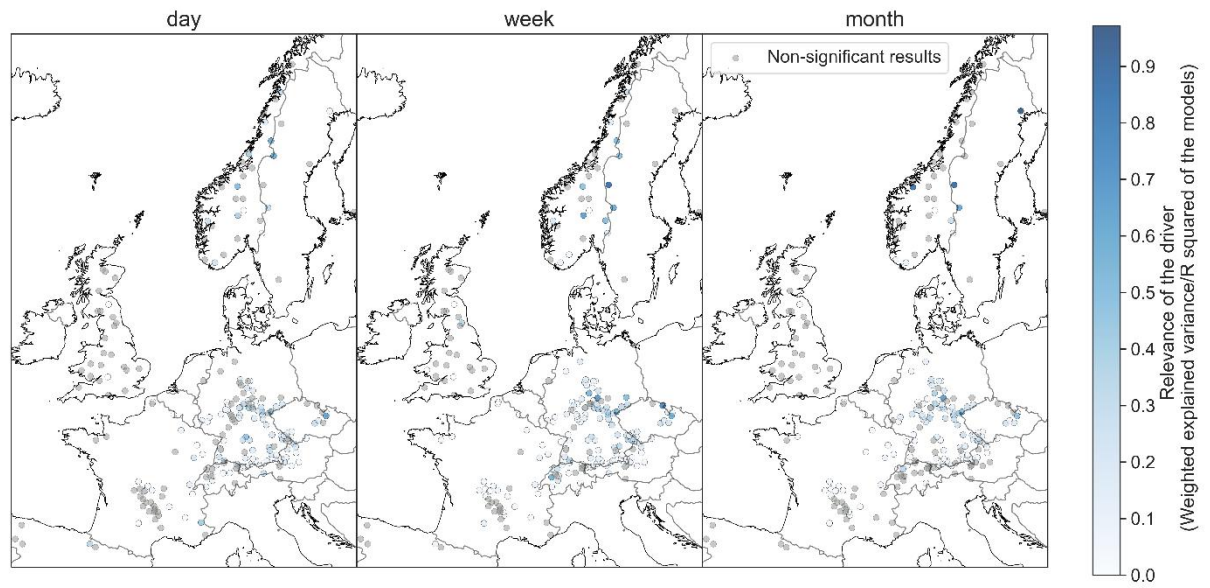

**Figure S6: Illustration of the relevance of rainfall (a), soil moisture (b) and snow melt (c) in the selected catchments of extreme high flows exceeding the 90th percentile using the multi-inference method.**

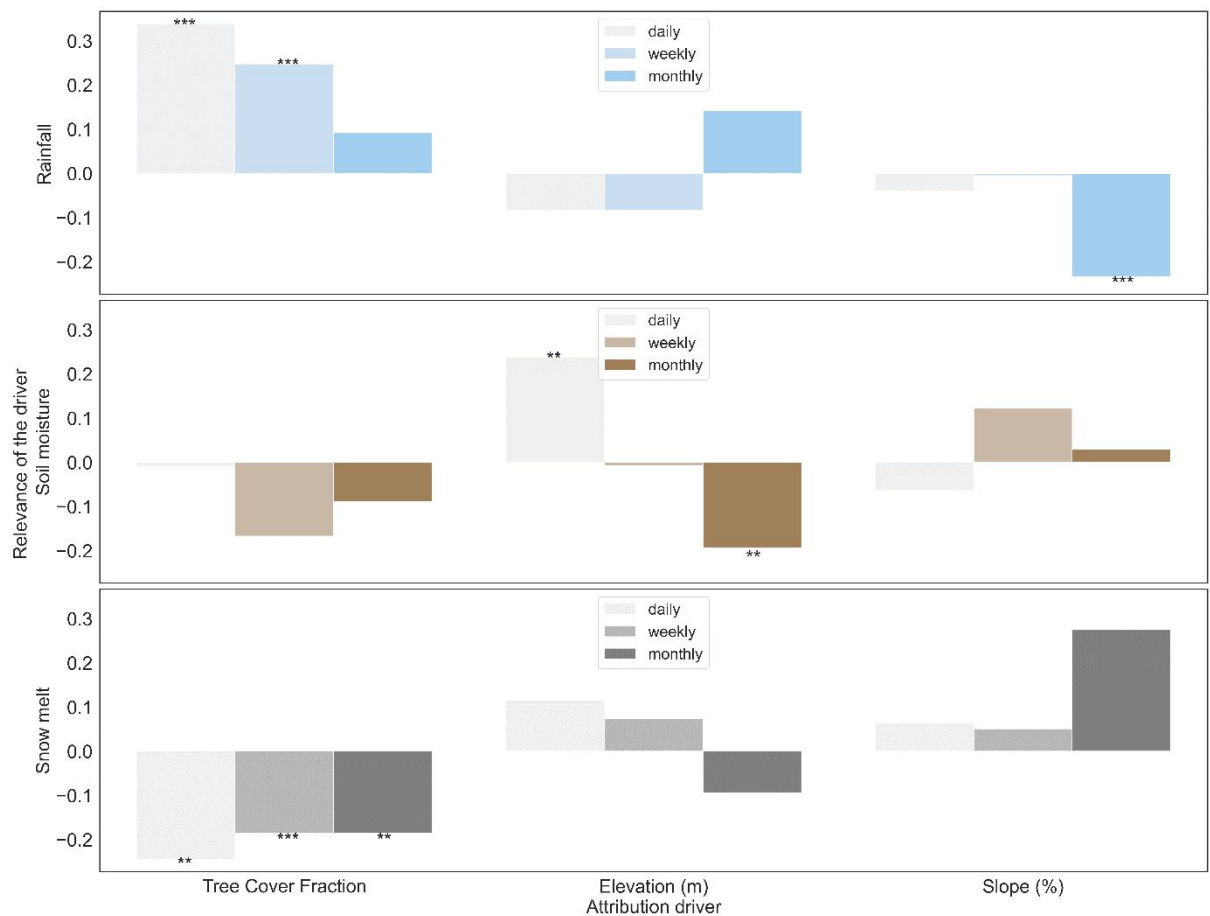



**Figure S7: Attributing the spatial patterns of the relevance of considered drivers of high flows to vegetation and terrain characteristics for high flow events exceeding the 90th percentile. Vertical axis corresponds to the partial correlation between driver relevance and each attribution variable. Results are shown for the considered different time scales. Stars on top of the bars indicate statistically significant partial correlations (\*\* : p-value <0.05 , \*\*\* : p-value < 0.005).**

Table S1: Searches for flood-related articles (TS: topic, PY: Year Published)

| Searches | Web of Science Query                                                                                         |
|----------|--------------------------------------------------------------------------------------------------------------|
| 1        | TS = ((flood* near/50 (rain*)) OR (flood* near/50 (precipitation*)))<br><br>AND PY= 2002-2021                |
| 2        | TS=((flood* near/50 evapo*) OR (flood* near/50 vegetation*)) AND PY=2002-2021                                |
| 3        | TS=((flood* near/50 (snow*)) OR (flood* near/50 (melt*))) AND PY=2002-2021                                   |
| 4        | TS=((flood* near/50 (soil* near/1 moisture*)) OR (flood* near/50 (soil* near/1 water*))) AND<br>PY=2002-2021 |
| 5        | #1 AND #2 AND #3 AND #4                                                                                      |
